# Supplementary material for: Effect of Ginseng Sapogenin Protopanaxadiol-Enriched Rice (DJ-PPD) on Immunomodulation
Source: MDPI journal article supplement (doi:10.3390/plants12040767), 2023-02-08
Supplement: s1 [file s1]

## Supplementary Materials

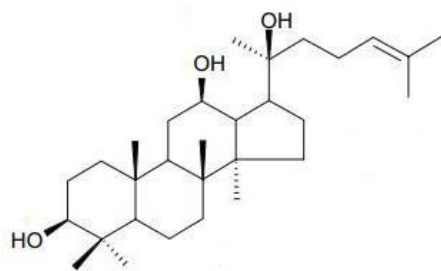

**Figure S1.** Protopanaxadiol chemical structure.

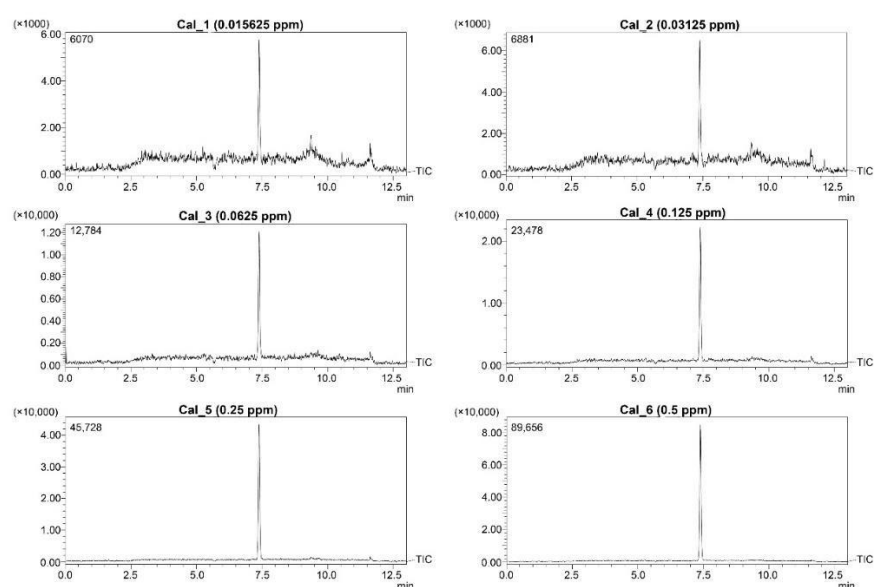

**Calibration curve**

ID# : 1 m/z : 425.0000>407.2000

Name : PPD

Quantitative method : External standard

Function :  $f(x) = 202,985x + 2592.25$

Rr1 = 0.9992163 Rr2 = 0.9984331

MeanRF:  $2.644939 \times 10^5$  RF SD:  $9.865022 \times 10^4$  RF %RSD: 37.297735

FitType : Linear

ZeroThrough : Not through

Weighted regression : None

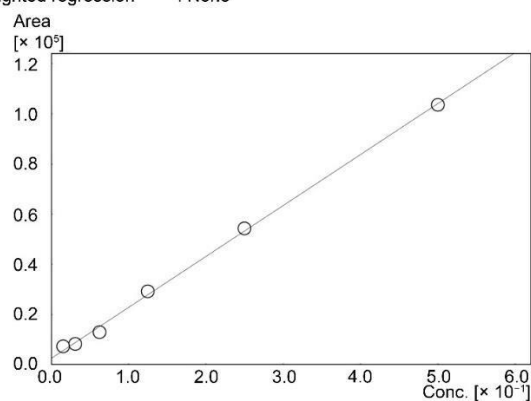

| # | Conc. (Ratio) | MeanArea | Area    |
|---|---------------|----------|---------|
| 1 | 0.015625      | 7210     | 7210    |
| 2 | 0.03125       | 8164     | 8164    |
| 3 | 0.0625        | 12,890   | 12,890  |
| 4 | 0.125         | 29,202   | 29,202  |
| 5 | 0.25          | 54,308   | 54,308  |
| 6 | 0.5           | 103,592  | 103,592 |

**Figure S2.** The calibration curve of PPD over the concentration range of 0.0156–0.50000 ppm.

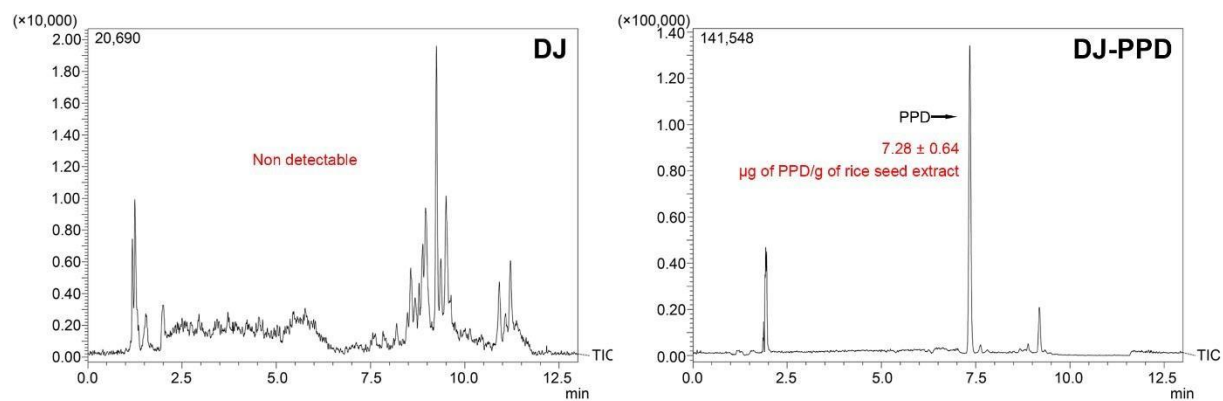

**Figure S3.** PPD analysis using LC-MS in DJ and DJ-PPD rice seeds. .
